# Supplementary material for: Budget impact analysis of the adoption of new hypertension guidelines in Colombia
Source: Springer Nature journal article supplement (doi:10.1186/s12962-018-0152-5), 2018-09-25
Supplement: MOESM1 [file 16150740]

## BUDGET IMPACT ANALYSIS OF THE ADOPTION OF NEW HYPERTENSION GUIDELINES IN COLOMBIA

**Supplementary file 1.** Confidence intervals for estimated cardiovascular events, obtained from probabilistic sensitivity analysis.

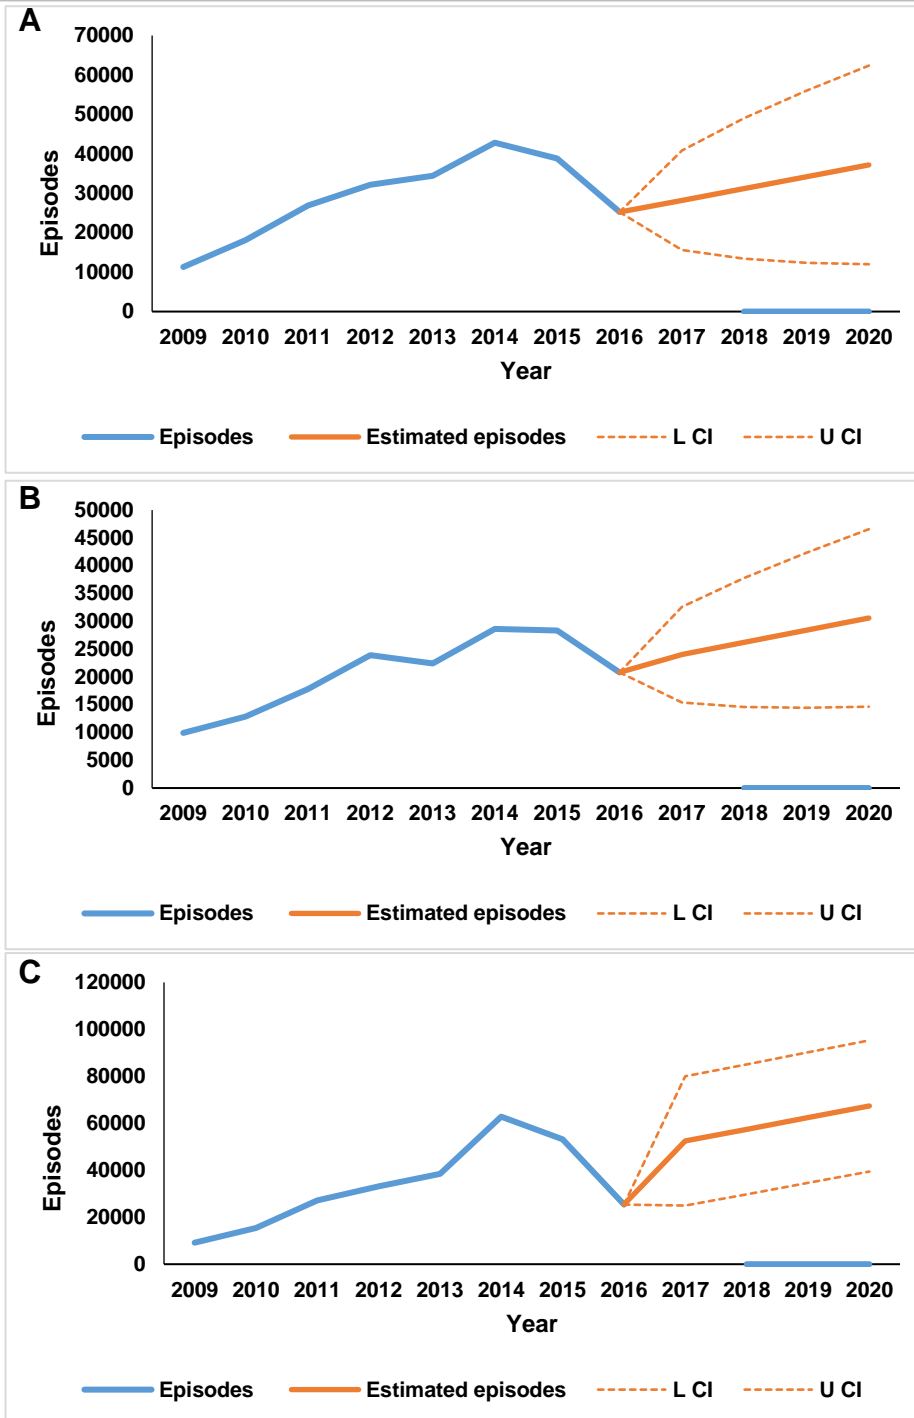

**A**, Acute myocardial infarction. **B**, Heart failure. **C**, Stroke.  
(L CI: Lower Confidence Interval. U CI: Upper Confidence Interval).
